# Supplementary material for: Mechanical stretch scales centriole number to apical area via Piezo1 in multiciliated cells
Source: eLife journal article supplement (doi:10.7554/elife.66076), 2021-06-29
Supplement: supp [file elife-66076-supp-v1.zip]

Archive with 18 entries (18 files):
- elife_poa_e66076_Figure_1_figure_supplement_1.png
- elife_poa_e66076_Figure_1_figure_supplement_2.png
- elife_poa_e66076_Figure_4_figure_supplement_1.png
- elife_poa_e66076_Figure_4_figure_supplement_2.png
- elife_poa_e66076_Figure_4_figure_supplement_3.png
- elife_poa_e66076_Figure_5_figure_supplement_1.png
- elife_poa_e66076_Video_1.avi
- elife_poa_e66076_Video_2.mp4
- elife_poa_e66076_Video_3.avi
- elife_poa_e66076_Video_4.mp4
- elife_poa_e66076_Video_5.mp4
- elife_poa_e66076_Transparent_Reporting_File.pdf
- elife_poa_e66076_Figure_1_source_data_1.xlsx
- elife_poa_e66076_Figure_2_source_data_2.xlsx
- elife_poa_e66076_Figure_3_source_data_3.xlsx
- elife_poa_e66076_Figure_4_source_data_4.xlsx
- elife_poa_e66076_Figure_5_source_data_5.xlsx
- elife_poa_e66076_Figure_6_source_data_6.xlsx
