# Supplementary material for: Mechanical stretch scales centriole number to apical area via Piezo1 in multiciliated cells
Source: eLife journal article supplement (doi:10.7554/elife.66076), 2021-06-29
Supplement: supp [file elife-66076-supp-v1.zip › elife_poa_e66076_Figure_1_source_data_1.xlsx]

## Sheet: Source data 1
Treatments	Apical area	Centriole number
X. tropicalis - Developing MCCs	83.11	42
X. tropicalis - Developing MCCs	45.54	33
X. tropicalis - Developing MCCs	185.37	118
X. tropicalis - Developing MCCs	70.59	41
X. tropicalis - Developing MCCs	218.89	139
X. tropicalis - Developing MCCs	61.94	42
X. tropicalis - Developing MCCs	125.67	103
X. tropicalis - Developing MCCs	111.42	84
X. tropicalis - Developing MCCs	110.69	98
X. tropicalis - Developing MCCs	166.641	100
X. tropicalis - Developing MCCs	116.14	83
X. tropicalis - Developing MCCs	77.93	29
X. tropicalis - Developing MCCs	80.86	53
X. tropicalis - Developing MCCs	67.29	33
X. tropicalis - Developing MCCs	37.152	29
X. tropicalis - Developing MCCs	26.12	11
X. tropicalis - Developing MCCs	266.15	142
X. tropicalis - Developing MCCs	140.92	88
X. tropicalis - Developing MCCs	48.61	29
X. tropicalis - Developing MCCs	5.75	2
X. tropicalis - Developing MCCs	12.9	3
X. tropicalis - Developing MCCs	68.484	50
X. tropicalis - Developing MCCs	57.492	34
X. tropicalis - Developing MCCs	23.72	12
X. tropicalis - Developing MCCs	82.39	38
X. tropicalis - Developing MCCs	3.5	1
X. tropicalis - Developing MCCs	43.89	34
X. tropicalis - Developing MCCs	24.53	4
X. tropicalis - Developing MCCs	90.002	66
X. tropicalis - Developing MCCs	143.82	84
X. tropicalis - Developing MCCs	88.112	55
X. tropicalis - Developing MCCs	97.28	69
X. tropicalis - Developing MCCs	63.86	48
X. tropicalis - Developing MCCs	148.57	78
X. tropicalis - Developing MCCs	36.59	20
X. tropicalis - Developing MCCs	39.17	19
X. tropicalis - Developing MCCs	115.074	63
X. tropicalis - Developing MCCs	89.24	45
X. tropicalis - Developing MCCs	186.657	139
X. tropicalis - Developing MCCs	151.821	112
X. tropicalis - Developing MCCs	26.043	8
X. tropicalis - Developing MCCs	177.98	113
X. tropicalis - Developing MCCs	156.686	127
X. tropicalis - Developing MCCs	177.294	149
X. tropicalis - Developing MCCs	109.32	92
X. tropicalis - Developing MCCs	186.56	109
X. tropicalis - Developing MCCs	147.09	139
X. tropicalis - Developing MCCs	155.84	103
X. tropicalis - Developing MCCs	208	131
X. tropicalis - Developing MCCs	175	138
X. tropicalis - Developing MCCs	133.78	127
X. tropicalis - Developing MCCs	173.89	110
X. tropicalis - Developing MCCs	262.39	203
X. tropicalis - Developing MCCs	202.32	137
X. tropicalis - Developing MCCs	226.67	148
X. tropicalis - Developing MCCs	282.04	151
X. tropicalis - Developing MCCs	212.58	131
X. tropicalis - Developing MCCs	223.87	148
X. tropicalis - Mature MCCs	299.43	154
X. tropicalis - Mature MCCs	242.91	141
X. tropicalis - Mature MCCs	262.89	145
X. tropicalis - Mature MCCs	331.15	154
X. tropicalis - Mature MCCs	327.73	120
X. tropicalis - Mature MCCs	345.63	169
X. tropicalis - Mature MCCs	322.2	151
X. tropicalis - Mature MCCs	312.29	163
X. tropicalis - Mature MCCs	233.51	136
X. tropicalis - Mature MCCs	243.26	136
X. tropicalis - Mature MCCs	308.36	155
X. tropicalis - Mature MCCs	262.29	148
X. tropicalis - Mature MCCs	234.69	134
X. tropicalis - Mature MCCs	289.33	152
X. tropicalis - Mature MCCs	284.28	163
X. tropicalis - Mature MCCs	329.59	139
X. tropicalis - Mature MCCs	307.92	169
X. tropicalis - Mature MCCs	239.45	138
X. tropicalis - Mature MCCs	175.39	125
X. tropicalis - Mature MCCs	203.91	137
X. tropicalis - Mature MCCs	221.55	133
X. tropicalis - Mature MCCs	262.2	170
X. tropicalis - Mature MCCs	332.41	173
X. tropicalis - Mature MCCs	247.94	132
X. tropicalis - Mature MCCs	274.92	147
X. tropicalis - Mature MCCs	243.4	151
X. tropicalis - Mature MCCs	288.6	150
X. tropicalis - Mature MCCs	211.42	148
X. tropicalis - Mature MCCs	260.59	141
X. tropicalis - Mature MCCs	276.97	165
X. tropicalis - Mature MCCs	280.71	170
X. tropicalis - Mature MCCs	295.54	149
X. tropicalis - Mature MCCs	204.88	120
X. tropicalis - Mature MCCs	210.38	121
X. tropicalis - Mature MCCs	291.46	165
X. tropicalis - Mature MCCs	266.65	178
X. tropicalis - Mature MCCs	135.62	92
X. tropicalis - Mature MCCs	312.76	163
X. tropicalis - Mature MCCs	266.73	142
X. tropicalis - Mature MCCs	279.27	172
X. tropicalis - Mature MCCs	239.85	169
X. tropicalis - Mature MCCs	132.1	96
X. tropicalis - Mature MCCs	189.9	170
X. tropicalis - Mature MCCs	227.89	183
X. tropicalis - Mature MCCs	169.36	136
X. tropicalis - Mature MCCs	241.56	161
X. tropicalis - Mature MCCs	272.74	200
X. tropicalis - Mature MCCs	174.4	140
X. tropicalis - Mature MCCs	215.54	131
X. tropicalis - Mature MCCs	292.11	140
X. tropicalis - Mature MCCs	331.93	143
X. tropicalis - Mature MCCs	316.75	136
X. tropicalis - Mature MCCs	297.34	162
X. tropicalis - Mature MCCs	327.77	138
X. tropicalis - Mature MCCs	342.66	168
X. tropicalis - Mature MCCs	344.77	153
X. laevis - Mature MCCs	289.72	172
X. laevis - Mature MCCs	292.14	210
X. laevis - Mature MCCs	294.91	197
X. laevis - Mature MCCs	313.73	188
X. laevis - Mature MCCs	326.79	193
X. laevis - Mature MCCs	328.99	179
X. laevis - Mature MCCs	329.76	229
X. laevis - Mature MCCs	333.04	206
X. laevis - Mature MCCs	333.23	214
X. laevis - Mature MCCs	338.68	201
X. laevis - Mature MCCs	342.31	225
X. laevis - Mature MCCs	344.88	195
X. laevis - Mature MCCs	345.53	237
X. laevis - Mature MCCs	350.87	197
X. laevis - Mature MCCs	354.67	181
X. laevis - Mature MCCs	354.82	201
X. laevis - Mature MCCs	363.2	236
X. laevis - Mature MCCs	371.67	222
X. laevis - Mature MCCs	394.8	245
X. laevis - Mature MCCs	415.81	248
X. laevis - Mature MCCs	427.81	225
X. laevis - Mature MCCs	254.64	170
X. laevis - Mature MCCs	366.2	165
X. laevis - Mature MCCs	406	180
X. laevis - Mature MCCs	320.7	157
X. laevis - Mature MCCs	265.72	134
X. laevis - Mature MCCs	310.94	132
X. laevis - Mature MCCs	386.23	195
X. laevis - Mature MCCs	369.94	153
X. laevis - Mature MCCs	338.02	179
X. laevis - Mature MCCs	336.85	152
X. laevis - Mature MCCs	369.56	166
X. laevis - Mature MCCs	333.28	177
X. laevis - Mature MCCs	293.87	162
X. laevis - Mature MCCs	296.95	195
X. laevis - Mature MCCs	426.59	173
X. laevis - Mature MCCs	375.48	210
X. laevis - Mature MCCs	500.94	191
X. laevis - Mature MCCs	526.43	194
X. laevis - Mature MCCs	577.21	223
X. laevis - Mature MCCs	526.17	197
X. laevis - Mature MCCs	466.9	239
X. laevis - Mature MCCs	437.19	242
X. laevis - Mature MCCs	499.39	240
X. laevis - Mature MCCs	404.56	221
X. laevis - Mature MCCs	371.35	220
X. laevis - Mature MCCs	390.23	221
X. laevis - Mature MCCs	456.78	233
X. laevis - Mature MCCs	391.78	217
X. laevis - Mature MCCs	463.81	234
X. laevis - Mature MCCs	432.12	178
X. laevis - Mature MCCs	473.73	191
X. laevis - Mature MCCs	482.87	208
X. laevis - Mature MCCs	564.49	215
X. laevis - Mature MCCs	583.28	207
X. laevis - Mature MCCs	493.56	200
X. laevis - Mature MCCs	455.26	174
X. laevis - Mature MCCs	470.83	186
X. laevis - Mature MCCs	462.38	192
X. laevis - Mature MCCs	547.26	183
X. laevis - Mature MCCs	499.27	205
X. laevis - Mature MCCs	562.58	196
X. laevis - Mature MCCs	515.96	178
X. laevis - Mature MCCs	407.99	157
X. laevis - Mature MCCs	437.15	162
X. laevis - Mature MCCs	575.01	213
X. laevis - Mature MCCs	511.56	183
X. laevis - Mature MCCs	529.67	189
MCIDAS	422.908	211
MCIDAS	471.825	222
MCIDAS	355.732	184
MCIDAS	527.928	318
MCIDAS	400.815	180
MCIDAS	340.195	163
MCIDAS	224.089	140
MCIDAS	344.619	212
MCIDAS	356.617	210
MCIDAS	374.835	213
MCIDAS	225.201	150
MCIDAS	285.393	189
MCIDAS	310.743	239
MCIDAS	451.596	185
MCIDAS	451.623	231
MCIDAS	307.968	176
MCIDAS	411.5	193
MCIDAS	438.15	173
MCIDAS	395.145	183
MCIDAS	467.441	211
MCIDAS	390.48	177
MCIDAS	465.052	158
MCIDAS	483.156	181
MCIDAS	322.282	161
MCIDAS	183.713	112
MCIDAS	661.661	230
MCIDAS	263.295	103
MCIDAS	351.913	42
MCIDAS	728.862	194
MCIDAS	311.017	119
MCIDAS	418.069	160
MCIDAS	236.241	124
MCIDAS	310.489	129
MCIDAS	291.186	125
MCIDAS	411.594	144
MCIDAS	488.493	178
MCIDAS	309.826	152
MCIDAS	369.892	151
MCIDAS	251.127	131
MCIDAS	244.833	81
MCIDAS	230.864	156
MCIDAS	212.975	124
MCIDAS	345.03	259
MCIDAS	238.747	184
MCIDAS	380.886	245
MCIDAS	235.01	189
MCIDAS	464.9	307
MCIDAS	255.235	190
MCIDAS	384.804	157
MCIDAS	471.239	209
MCIDAS	558.404	253
MCIDAS	383.806	179
MCIDAS	311.705	182
MCIDAS	384.744	232
MCIDAS	315.521	166
MCIDAS	421.832	159
MCIDAS	361.178	192
MCIDAS	465.415	237
MCIDAS	220.724	114
MCIDAS	237.26	151
MCIDAS	316.391	118
MCIDAS	354.35	151
MCIDAS	303.336	161
MCIDAS	348.458	157
MCIDAS	425.782	156
Controls - fused cells	254.64	170
Controls - fused cells	366.2	165
Controls - fused cells	406	180
Controls - fused cells	320.7	157
Controls - fused cells	265.72	134
Controls - fused cells	310.94	132
Controls - fused cells	386.23	195
Controls - fused cells	369.94	153
Controls - fused cells	338.02	179
Controls - fused cells	336.85	152
Controls - fused cells	369.56	166
Controls - fused cells	333.28	177
Controls - fused cells	293.87	162
Controls - fused cells	296.95	195
Controls - fused cells	426.59	173
Controls - fused cells	375.48	210
Fused cells	408.84	235
Fused cells	426.89	265
Fused cells	534.09	258
Fused cells	410.42	190
Fused cells	450.94	235
Fused cells	440.38	248
Fused cells	508.03	245
Fused cells	430	187
Fused cells	615	176
Fused cells	493.99	218
Fused cells	387	179
Fused cells	449.68	223
Fused cells	695.9	213
Fused cells	486.72	208
Fused cells	434.25	191
Fused cells	710.76	220
Fused cells	921.86	267
Fused cells	671.39	197
Fused cells	867.13	243
Fused cells	769.15	259
Fused cells	830.83	285
Fused cells	753.62	221
Fused cells	655.23	224
Fused cells	677.84	246
Fused cells	573.79	239
Fused cells	667.66	301
Fused cells	677.84	246
Fused cells	573.79	239
Fused cells	667.66	301
Fused cells	505.59	220
Fused cells	479.98	274
Fused cells	559.06	301
Fused cells	332.25	200
Fused cells	399.18	211
Fused cells	407.61	235
Fused cells	380.53	202
Fused cells	718.61	218
Fused cells	557.89	295
Fused cells	526.66	355
Controls - ccdc11 MO	166.641	100
Controls - ccdc11 MO	173.89	110
Controls - ccdc11 MO	175	138
Controls - ccdc11 MO	177.294	149
Controls - ccdc11 MO	177.98	113
Controls - ccdc11 MO	185.37	118
Controls - ccdc11 MO	186.56	109
Controls - ccdc11 MO	186.657	139
Controls - ccdc11 MO	202.32	137
Controls - ccdc11 MO	208	131
Controls - ccdc11 MO	212.58	131
Controls - ccdc11 MO	218.89	139
Controls - ccdc11 MO	223.87	148
Controls - ccdc11 MO	226.67	148
Controls - ccdc11 MO	262.39	203
Controls - ccdc11 MO	266.15	142
Controls - ccdc11 MO	282.04	151
Controls - ccdc11 MO	173.89	110
Controls - ccdc11 MO	262.39	203
Controls - ccdc11 MO	202.32	137
Controls - ccdc11 MO	226.67	148
Controls - ccdc11 MO	186.56	109
Controls - ccdc11 MO	147.09	139
Controls - ccdc11 MO	155.84	103
Controls - ccdc11 MO	208	131
Controls - ccdc11 MO	175	138
Controls - ccdc11 MO	133.78	127
Controls - ccdc11 MO	173.89	110
Controls - ccdc11 MO	262.39	203
Controls - ccdc11 MO	202.32	137
Controls - ccdc11 MO	226.67	148
Controls - ccdc11 MO	282.04	151
Controls - ccdc11 MO	212.58	131
Controls - ccdc11 MO	223.87	148
ccdc11 MO	293.9	127
ccdc11 MO	321.15	193
ccdc11 MO	647.96	465
ccdc11 MO	355.08	271
ccdc11 MO	398.91	221
ccdc11 MO	554.93	318
ccdc11 MO	419.37	209
ccdc11 MO	437.06	218
ccdc11 MO	488.85	272
ccdc11 MO	561.3	246
ccdc11 MO	417.55	236
ccdc11 MO	437.9	168
ccdc11 MO	896.75	310
ccdc11 MO	656.31	227
ccdc11 MO	505.94	225
ccdc11 MO	645.54	217
ccdc11 MO	793.94	398
ccdc11 MO	565.41	307
ccdc11 MO	390.65	283
ccdc11 MO	324.59	239
ccdc11 MO	415.59	182
ccdc11 MO	480.61	209
ccdc11 MO	330.45	222
