# Supplementary material for: Mechanical stretch scales centriole number to apical area via Piezo1 in multiciliated cells
Source: eLife journal article supplement (doi:10.7554/elife.66076), 2021-06-29
Supplement: supp [file elife-66076-supp-v1.zip › elife_poa_e66076_Figure_2_source_data_2.xlsx]

## Sheet: Source data 2
Treatments	Centriole number	Apical area
X. Laevis Controls	157	237.3
X. Laevis Controls	163	237.77
X. Laevis Controls	131	255.66
X. Laevis Controls	118	162.28
X. Laevis Controls	152	207.81
X. Laevis Controls	179	328.99
X. Laevis Controls	172	257.23
X. Laevis Controls	138	207.91
X. Laevis Controls	236	363.2
X. Laevis Controls	153	250.72
X. Laevis Controls	155	282.75
X. Laevis Controls	151	225.95
X. Laevis Controls	177	264.11
X. Laevis Controls	131	249.3
X. Laevis Controls	154	230.62
X. Laevis Controls	144	203.49
X. Laevis Controls	174	271.83
X. Laevis Controls	158	210.23
X. Laevis Controls	142	168.62
X. Laevis Controls	155	192.64
X. Laevis Controls	164	165.44
X. Laevis Controls	155	146.59
X. Laevis Controls	174	186.6
X. Laevis Controls	133	156.38
X. Laevis Controls	183	195.43
X. Laevis Controls	184	231.26
X. Laevis Controls	183	268.63
X. Laevis Controls	134	172.07
X. Laevis Controls	120	168.39
X. Laevis Controls	134	175.18
X. Laevis Controls	147	266.27
X. Laevis Controls	134	174.59
X. Laevis Controls	139	189.28
X. Laevis Controls	151	248.86
X. Laevis Controls	147	213.37
X. Laevis Controls	164	238.91
X. Laevis Controls	142	210.71
X. Laevis Controls	152	223.85
X. Laevis Controls	169	244.61
X. Laevis Controls	131	219.85
X. Laevis Controls	178	233.37
X. Laevis Controls	210	292.14
X. Laevis Controls	138	174.51
X. Laevis Controls	160	206.8
X. Laevis Controls	140	231.88
X. Laevis Controls	145	240.78
X. Laevis Controls	199	209.06
X. Laevis Controls	203	232.32
X. Laevis Controls	199	251.05
X. Laevis Controls	130	200.53
X. Laevis Controls	199	271.06
X. Laevis Controls	158	172.82
X. Laevis Controls	159	191.59
X. Laevis Controls	179	235.54
X. Laevis Controls	193	209.8
X. Laevis Controls	229	329.76
X. Laevis Controls	185	264.16
X. Laevis Controls	168	259.64
X. Laevis Controls	149	197.1
X. Laevis Controls	148	211.13
X. Laevis Controls	184	260.33
X. Laevis Controls	163	244.26
X. Laevis Controls	181	354.67
X. Laevis Controls	173	247
X. Laevis Controls	195	344.88
X. Laevis Controls	172	289.72
X. Laevis Controls	225	427.81
X. Laevis Controls	149	250.61
X. Laevis Controls	193	326.79
X. Laevis Controls	115	177.65
X. Laevis Controls	197	350.87
X. Laevis Controls	194	287.16
X. Laevis Controls	201	338.68
X. Laevis Controls	201	354.82
X. Laevis Controls	222	371.67
CEP152 O.E.	715	1071.65
CEP152 O.E.	498	580.55
CEP152 O.E.	580	514.72
CEP152 O.E.	464	870.42
CEP152 O.E.	617	981.29
CEP152 O.E.	442	480.14
CEP152 O.E.	384	657.98
CEP152 O.E.	434	791.26
CEP152 O.E.	429	537.03
CEP152 O.E.	529	697.48
CEP152 O.E.	547	1670.02
CEP152 O.E.	643	1253.32
CEP152 O.E.	300	1071.72
CEP152 O.E.	575	1397.86
CEP152 O.E.	654	1487
CEP152 O.E.	651	1018.82
CEP152 O.E.	469	1159.06
CEP152 O.E.	407	914.9
CEP152 O.E.	313	589.59
CEP152 O.E.	435	779.96
CEP152 O.E.	510	1068.12
CEP152 O.E.	373	908.16
CEP152 O.E.	321	1017.29
CEP152 O.E.	561	1060.42
CEP152 O.E.	237	712.08
CEP152 O.E.	205	688.16
CEP152 O.E.	359	588.67
CEP152 O.E.	491	926.88
CEP152 O.E.	414	734.8
CEP152 O.E.	528	525.65
CEP152 O.E.	457	456.51
CEP152 O.E.	570	677.61
CEP152 O.E.	406	545.35
CEP152 O.E.	486	598.37
CEP152 O.E.	413	650.95
CEP152 O.E.	482	559.88
CEP152 O.E.	340	511.56
CEP152 O.E.	537	545.74
CEP152 O.E.	369	542.18
CEP152 O.E.	528	614.59
CEP152 O.E.	490	532
CEP152 O.E.	384	567.56
Controls - centrinone	105	132.9
Controls - centrinone	104	113.14
Controls - centrinone	98	122.35
Controls - centrinone	101	140.48
Controls - centrinone	81	95.88
Controls - centrinone	113	122.6
Controls - centrinone	65	86.69
Controls - centrinone	73	107.43
Controls - centrinone	115	139.31
Controls - centrinone	89	99.57
Controls - centrinone	133	176.27
Controls - centrinone	118	167.94
Controls - centrinone	76	98.69
Controls - centrinone	108	139.12
Controls - centrinone	119	142.68
Controls - centrinone	116	164.79
Controls - centrinone	104	124.92
Controls - centrinone	95	112.16
Controls - centrinone	131	173.057
Controls - centrinone	95	120.387
Controls - centrinone	68	80.007
Controls - centrinone	121	142.144
Controls - centrinone	117	188.621
Controls - centrinone	94	113.98
Controls - centrinone	113	223.46
Controls - centrinone	96	152.57
Controls - centrinone	101	161.7
Controls - centrinone	91	122.47
Controls - centrinone	107	171.5
Controls - centrinone	121	235.46
Controls - centrinone	156	202.46
Centrinone	10	131.47
Centrinone	16	231.16
Centrinone	44	204.03
Centrinone	3	134.61
Centrinone	23	185.33
Centrinone	17	138.55
Centrinone	2	158.3
Centrinone	12	170.49
Centrinone	8	140.7
Centrinone	18	250.99
Centrinone	77	358.94
Centrinone	10	278.34
Centrinone	44	260.9
Centrinone	50	261.33
Centrinone	43	181.23
Centrinone	26	199.27
Centrinone	8	292.22
Centrinone	28	245.44
Centrinone	11	203.29
Centrinone	13	98.84
Centrinone	5	153.75
Centrinone	24	147.5
Centrinone	23	90.61
Centrinone	35	112.86
Centrinone	29	163.27
Centrinone	25	111.11
Centrinone	22	117.15
Centrinone	15	135.88
Centrinone	33	119.69
Centrinone	35	100.28
Centrinone	32	161.19
Centrinone	57	209.8
Centrinone	50	165.07
