# Supplementary material for: Mechanical stretch scales centriole number to apical area via Piezo1 in multiciliated cells
Source: eLife journal article supplement (doi:10.7554/elife.66076), 2021-06-29
Supplement: supp [file elife-66076-supp-v1.zip › elife_poa_e66076_Figure_3_source_data_3.xlsx]

## Sheet: Source data 3
Emerging MCCs	X. tropicalis	X. laevis
Centriole number	78	123
Centriole number	89	107
Centriole number	99	126
Centriole number	70	93
Centriole number	70	86
Centriole number	98	112
Centriole number	102	65
Centriole number	75	99
Centriole number	84	70
Centriole number	75	79
Centriole number	75	78
Centriole number	70	85
Centriole number	100
Centriole number	50
Centriole number	75
