# Supplementary material for: Mechanical stretch scales centriole number to apical area via Piezo1 in multiciliated cells
Source: eLife journal article supplement (doi:10.7554/elife.66076), 2021-06-29
Supplement: supp [file elife-66076-supp-v1.zip › elife_poa_e66076_Figure_4_source_data_4.xlsx]

## Sheet: Source data 4
Treatments	Apical area	Centriole number
Controls	304.42	153
Controls	248.8	141
Controls	262.76	145
Controls	330.49	162
Controls	325.68	120
Controls	349	166
Controls	324.05	149
Controls	314.57	163
Controls	232.86	138
Controls	241.38	138
Controls	307.61	154
Controls	263.26	146
Controls	239.4	131
Controls	290.53	153
Controls	292.75	163
Controls	331.8	141
Controls	306.79	167
Controls	247.66	142
Controls	177.53	133
Controls	204.4	136
Controls	261.91	163
Controls	189.3	131
Controls	227.89	155
Controls	183.03	132
Controls	206.04	138
Controls	259.69	177
Controls	323.45	174
Controls	240.76	133
Controls	267.07	147
Controls	232.81	151
Controls	277.21	153
Controls	203.42	153
Controls	286.83	167
Controls	249.86	149
Controls	274.39	173
Controls	285.39	148
Animal cap unethered	178.44	170
Animal cap unethered	89.42	97
Animal cap unethered	116.12	141
Animal cap unethered	117.79	90
Animal cap unethered	191.23	163
Animal cap unethered	66.16	82
Animal cap unethered	85.53	92
Animal cap unethered	96.58	136
Animal cap unethered	194.13	102
Animal cap unethered	97.86	73
Animal cap unethered	152.3	147
Animal cap unethered	109.93	106
Animal cap unethered	123.112	90
Animal cap unethered	83.27	84
Animal cap unethered	116.84	80
Animal cap unethered	104.82	112
Animal cap unethered	184.22	120
Animal cap unethered	123.88	86
Animal cap unethered	77.13	94
Animal cap unethered	119.97	104
Animal cap unethered	96.85	80
Animal cap unethered	104.9	86
Animal cap unethered	80.08	85
Animal cap unethered	98.77	58
Animal cap unethered	136.23	125
Animal cap unethered	111.49	123
Animal cap unethered	99.56	105
Animal cap unethered	113.92	103
Animal cap unethered	133.407	105
Animal cap unethered	151.655	102
Animal cap unethered	98.71	78
Animal cap unethered	144.7	101
Animal cap unethered	149.3	105
Animal cap unethered	139.78	119
Animal cap unethered	176.05	132
Animal cap unethered	143.306	111
Animal cap unethered	143.134	113
Animal cap unethered	104.703	95
Animal cap unethered	161.279	131
Animal cap unethered	177.413	135
Animal cap unethered	153.959	110
Animal cap unethered	114.612	93
Animal cap unethered	87.04	105
Animal cap unethered	65.52	85
Animal cap unethered	96.79	118
Animal cap unethered	227.25	195
Animal cap tethered	188.25	130
Animal cap tethered	229.03	115
Animal cap tethered	199.77	149
Animal cap tethered	197.48	113
Animal cap tethered	240.1	145
Animal cap tethered	214.99	134
Animal cap tethered	248.63	131
Animal cap tethered	203.76	110
Animal cap tethered	177.49	123
Animal cap tethered	218	93
Animal cap tethered	210	101
Animal cap tethered	175	114
Animal cap tethered	184.29	123
Animal cap tethered	118.5	78
Animal cap tethered	217.02	142
Animal cap tethered	156.73	103
Animal cap tethered	260.82	145
Animal cap tethered	241.55	179
Animal cap tethered	141.21	109
Animal cap tethered	199.75	112
Animal cap tethered	172.24	122
Animal cap tethered	222.73	111
Animal cap tethered	197.47	150
Animal cap tethered	196.05	100
Animal cap tethered	241.35	145
Animal cap tethered	255.44	135
Animal cap tethered	262.76	181
Animal cap tethered	212.79	128
Animal cap tethered	338.23	166
Animal cap tethered	177.39	108
Animal cap tethered	148.3	135
Animal cap tethered	154.38	124
Animal cap tethered	232.61	206
Animal cap tethered	143.76	126
Animal cap tethered	199.51	128
Animal cap tethered	209.1	144
Animal cap tethered	243.66	140
Animal cap tethered	201.63	115
Animal cap tethered	273.25	170
Animal cap tethered	267.19	150
Animal cap tethered	224.1	130
Animal cap tethered	244.61	155
Animal cap tethered	225.42	163
Animal cap tethered	273.7	190
Animal cap tethered	184.53	120
Animal cap tethered	222.47	145
Animal cap tethered	201.4	144
Animal cap tethered	160.28	128
Animal cap tethered	178.39	133
Animal cap tethered	311	165
Animal cap tethered	209.29	118
Animal cap tethered	291.717	170
Animal cap tethered	217.376	126
Animal cap tethered	259.58	145
Animal cap tethered	175.15	121
Animal cap tethered	229.359	136
Animal cap tethered	188.228	122
Animal cap stretched	395.18	188
Animal cap stretched	405.65	197
Animal cap stretched	408.1	199
Animal cap stretched	476.56	170
Animal cap stretched	409.9	217
Animal cap stretched	404.68	214
Animal cap stretched	376.61	188
Animal cap stretched	460.8	296
Animal cap stretched	474.88	200
Animal cap stretched	579.83	221
Animal cap stretched	426.81	190
Controls - B-cat MO	204.88	120
Controls - B-cat MO	210.38	121
Controls - B-cat MO	291.46	165
Controls - B-cat MO	266.65	178
Controls - B-cat MO	135.62	92
Controls - B-cat MO	312.76	163
Controls - B-cat MO	266.73	142
Controls - B-cat MO	279.27	172
Controls - B-cat MO	239.85	169
Controls - B-cat MO	132.1	96
Controls - B-cat MO	189.9	170
Controls - B-cat MO	227.89	183
Controls - B-cat MO	169.36	136
Controls - B-cat MO	241.56	161
Controls - B-cat MO	272.74	200
Controls - B-cat MO	174.4	140
Controls - B-cat MO	215.54	131
Controls - B-cat MO	292.11	140
Controls - B-cat MO	331.93	143
Controls - B-cat MO	316.75	136
Controls - B-cat MO	297.34	162
Controls - B-cat MO	327.77	138
Controls - B-cat MO	342.66	168
Controls - B-cat MO	344.77	153
B-cat MO	106.36	83
B-cat MO	103.15	77
B-cat MO	89.57	77
B-cat MO	171.07	107
B-cat MO	93.6	87
B-cat MO	108.86	100
B-cat MO	129.43	126
B-cat MO	105.16	92
B-cat MO	114.33	91
B-cat MO	134.8	101
B-cat MO	93.92	89
B-cat MO	122.29	120
B-cat MO	106.06	125
B-cat MO	102.51	107
B-cat MO	102.86	103
B-cat MO	124.46	126
B-cat MO	85.4	105
B-cat MO	88.17	92
B-cat MO	119.97	120
B-cat MO	124.33	129
B-cat MO	102.34	86
B-cat MO	101.85	86
B-cat MO	92.88	83
B-cat MO	193.6	126
B-cat MO	110.54	86
B-cat MO	126.29	119
B-cat MO	106.44	97
B-cat MO	173.81	105
B-cat MO	155.09	103
B-cat MO	103.55	99
B-cat MO	100.67	88
	Non -MCC apical area
Embryo	261.077
Embryo	409.49
Embryo	1193.46
Embryo	619.517
Embryo	469.614
Embryo	530.893
Embryo	469.538
Embryo	621.058
Embryo	549.348
Embryo	456.861
Embryo	510.953
Embryo	398.547
Embryo	439.864
Embryo	458.024
Embryo	485.641
Embryo	487.096
Embryo	544.369
Embryo	461.399
Embryo	473.201
Embryo	210.701
Embryo	308.534
Embryo	501.334
Embryo	479.631
Embryo	448.406
Embryo	374.259
Embryo	369.756
Embryo	359.082
Embryo	459.414
Embryo	791.73
Embryo	412.345
Embryo	428.997
Embryo	437.721
Embryo	612.146
Embryo	874.9
Animal cap untethered	248.023
Animal cap untethered	214.224
Animal cap untethered	205.014
Animal cap untethered	170.375
Animal cap untethered	173.326
Animal cap untethered	615.812
Animal cap untethered	169.367
Animal cap untethered	332.894
Animal cap untethered	163.094
Animal cap untethered	155.727
Animal cap untethered	198.423
Animal cap untethered	191.637
Animal cap untethered	227.138
Animal cap untethered	276.598
Animal cap untethered	106.094
Animal cap untethered	104.371
Animal cap untethered	106.762
Animal cap untethered	176.396
Animal cap untethered	81.428
Animal cap untethered	107.85
Animal cap untethered	127.054
Animal cap untethered	121.163
Animal cap untethered	104.888
Animal cap untethered	110.607
Animal cap untethered	109.261
Animal cap untethered	87.212
Animal cap untethered	92.307
Animal cap untethered	175.804
Animal cap untethered	106.072
Animal cap untethered	138.924
Animal cap untethered	90.562
Animal cap untethered	335.786
Animal cap untethered	394.188
Animal cap untethered	411.307
Animal cap untethered	242.495
Animal cap untethered	216.022
Animal cap untethered	238.211
Animal cap untethered	194.696
Animal cap untethered	110.338
Animal cap untethered	180.597
Animal cap untethered	106.568
Animal cap untethered	106.869
Animal cap untethered	175.556
Animal cap untethered	189.138
Animal cap untethered	227.353
Animal cap untethered	133.064
Animal cap untethered	167.564
Animal cap untethered	184.797
Animal cap untethered	192.119
Animal cap untethered	201.857
Animal cap untethered	206.253
Animal cap untethered	166.51
Animal cap untethered	154.8
Animal cap untethered	164.99
Animal cap untethered	264.976
Animal cap untethered	173.143
Animal cap untethered	165.517
Animal cap untethered	201.589
Animal cap untethered	249.466
Animal cap untethered	79.511
Animal cap untethered	170.795
Animal cap untethered	163.083
Animal cap untethered	168.135
Animal cap untethered	159.313
Animal cap untethered	135.606
Animal cap untethered	194.836
Animal cap untethered	211.089
Animal cap untethered	131.126
Animal cap untethered	181.921
Animal cap tethered	250.716
Animal cap tethered	265.924
Animal cap tethered	330.6
Animal cap tethered	331.483
Animal cap tethered	318.916
Animal cap tethered	347.197
Animal cap tethered	297.983
Animal cap tethered	218.065
Animal cap tethered	193.04
Animal cap tethered	397.502
Animal cap tethered	343.616
Animal cap tethered	327.877
Animal cap tethered	356.892
Animal cap tethered	314.292
Animal cap tethered	392.239
Animal cap tethered	253.997
Animal cap tethered	294.483
Animal cap tethered	319.567
Animal cap tethered	297.221
Animal cap tethered	335.326
Animal cap tethered	494.622
Animal cap tethered	663.951
Animal cap tethered	436.813
Animal cap tethered	461.878
Animal cap tethered	765.886
Animal cap tethered	950.161
Animal cap tethered	482.456
Animal cap tethered	539.01
Animal cap tethered	683.165
Animal cap tethered	552.3
Animal cap tethered	566.776
Animal cap tethered	446.555
Animal cap tethered	505.881
Animal cap tethered	325.905
Animal cap tethered	532.612
Animal cap tethered	476.28
Animal cap tethered	388.899
Animal cap tethered	312.051
Animal cap tethered	531.675
Animal cap tethered	612.356
Controls	406.735
Controls	483.506
Controls	363.264
Controls	414.653
Controls	413.231
Controls	353.843
Controls	487.637
Controls	707.37
Controls	580.598
Controls	328.538
Controls	622.973
Controls	550.87
Controls	422.169
Controls	524.675
Controls	422.94
Controls	290.395
Controls	385.155
Controls	601.144
Controls	431.911
Controls	683.032
Controls	423.222
Controls	465.573
Controls	405.443
Controls	217.87
Controls	730.865
Controls	336.341
Controls	376.749
Controls	622.341
Controls	467.287
Controls	492.798
B-cat MO	531.769
B-cat MO	243.146
B-cat MO	235.965
B-cat MO	358.821
B-cat MO	379.368
B-cat MO	363.039
B-cat MO	223.232
B-cat MO	396.4
B-cat MO	298.782
B-cat MO	172.541
B-cat MO	323.363
B-cat MO	385.361
B-cat MO	197.405
B-cat MO	338.424
B-cat MO	358.625
B-cat MO	402.259
B-cat MO	384.408
B-cat MO	427.463
B-cat MO	380.478
B-cat MO	128.644
B-cat MO	182.541
B-cat MO	210.244
B-cat MO	158.97
B-cat MO	176.778
B-cat MO	153.776
B-cat MO	240.547
B-cat MO	241.638
B-cat MO	175.686
B-cat MO	319.491
B-cat MO	347.385
B-cat MO	359.707
B-cat MO	360.272
B-cat MO	101.491
Apical area	0-100	101-150	151-250	251-350	351-600
Thinness Ratio	0.864331	0.912446	0.867316	0.837218	0.743186
Thinness Ratio	0.972751	0.92697	0.82386	0.722787	0.574023
Thinness Ratio	0.835562	0.848183	0.788786	0.709198	0.88132
Thinness Ratio	0.810624	0.871487	0.827982	0.722594	0.818251
Thinness Ratio	0.913558	0.917283	0.898055	0.800478	0.854907
Thinness Ratio	0.930475	0.794651	0.823047	0.819433	0.596394
Thinness Ratio	0.950927	0.919268	0.897779	0.898504	0.457901
Thinness Ratio	0.854723	0.8043	0.837095	0.789444	0.640633
Thinness Ratio	0.897744	0.953525	0.762655	0.726296	0.645538
Thinness Ratio	0.873722	0.831038	0.817792	0.860098	0.641829
Thinness Ratio	0.774704	0.92361	0.713147	0.798794	0.7813
Thinness Ratio	0.96034	0.929099	0.756695		0.780629
Thinness Ratio	0.928428	0.90876	0.703691		0.71441
Thinness Ratio	0.952417	0.869465	0.783664		0.675451
Thinness Ratio	0.864331	0.941261	0.77255		0.83713
Thinness Ratio	0.972751	0.887412	0.815678
Thinness Ratio	0.835562	0.898502	0.79483
Thinness Ratio	0.810624	0.89414	0.889128
Thinness Ratio	0.913558	0.834961	0.694857
Thinness Ratio	0.930475	0.732462	0.781068
Thinness Ratio	0.950927	0.857074	0.892645
Thinness Ratio	0.854723	0.955946	0.81875
Thinness Ratio	0.897744	0.934292	0.762056
Thinness Ratio	0.873722	0.932561	0.852025
Thinness Ratio	0.774704	0.943117	0.729704
Thinness Ratio	0.96034	0.792515	0.870646
Thinness Ratio	0.928428	0.831412	0.7015
Thinness Ratio	0.952417	0.826327	0.871641
Thinness Ratio		0.856575	0.79258
Thinness Ratio		0.871612	0.799568
Thinness Ratio			0.842045
Thinness Ratio			0.62098
Thinness Ratio			0.692506
Thinness Ratio			0.746474
Thinness Ratio			0.858552
	Controls	B-cat MO
Thinness Ratio	0.696269	0.777702
Thinness Ratio	0.683462	0.951326
Thinness Ratio	0.796768	0.953703
Thinness Ratio	0.704232	0.954079
Thinness Ratio	0.792796	0.854749
Thinness Ratio	0.771005	0.940053
Thinness Ratio	0.826199	0.919268
Thinness Ratio	0.682037	0.936415
Thinness Ratio	0.646634	0.928291
Thinness Ratio	0.769587	0.936301
Thinness Ratio	0.784211	0.939091
Thinness Ratio	0.797213	0.942709
Thinness Ratio	0.808121	0.945365
Thinness Ratio	0.837607	0.858522
Thinness Ratio	0.738733	0.930607
Thinness Ratio	0.726546	0.858397
Thinness Ratio	0.651356	0.863848
Thinness Ratio	0.806393	0.829847
Thinness Ratio	0.752743	0.827235
Thinness Ratio	0.728807	0.970222
Thinness Ratio	0.796986	0.834308
Thinness Ratio	0.830382	0.882405
Thinness Ratio		0.943293
Thinness Ratio		0.957003
Thinness Ratio		0.854759
Thinness Ratio		0.910499
Thinness Ratio		0.938553
Thinness Ratio		0.947637
Thinness Ratio		0.879458
Thinness Ratio		0.9332
Thinness Ratio		0.909552
