# Supplementary material for: Mechanical stretch scales centriole number to apical area via Piezo1 in multiciliated cells
Source: eLife journal article supplement (doi:10.7554/elife.66076), 2021-06-29
Supplement: supp [file elife-66076-supp-v1.zip › elife_poa_e66076_Figure_5_source_data_5.xlsx]

## Sheet: Source data 5
Treatments	Apical area	Centriole number
Controls	350.12	185
Controls	315.6	145
Controls	300.62	188
Controls	230.62	144
Controls	209.44	113
Controls	290.35	143
Controls	363.31	161
Controls	230.79	127
Controls	325.79	134
Controls	211.29	127
Controls	191.36	117
Controls	175.9	103
Controls	187.57	113
Controls	149.6	101
Controls	237.95	122
Controls	266.64	151
Controls	156.94	106
Controls	231.74	127
Controls	261.42	118
Controls	298.17	138
Controls	266.7	137
Controls	266.2	144
Controls	281.97	152
Controls	269.97	178
Controls	245.22	131
Controls	231.94	141
Controls	198.4	108
Controls	275.92	128
Controls	192.32	107
Controls	341.05	148
Controls	366.11	161
Controls	190.75	131
Controls	201.24	128
Controls	273.89	201
Controls	151.89	112
Controls	310.16	134
Controls	306.18	127
Controls	407.56	131
Controls	311.027	136
Controls	402.32	161
Controls	271.71	121
Controls	158.58	113
Controls	202.87	149
Controls	222.9	170
Controls	220.8	133
Controls	233.93	135
Controls	307.37	150
Controls	288.29	121
Controls	273.61	128
Controls	353.05	217
Controls	288.11	145
Controls	283.16	142
Controls	271.35	146
Controls	314.45	140
Controls	274.22	152
Controls	299.43	154
Controls	242.91	141
Controls	262.89	145
Controls	331.15	154
Controls	327.73	120
Controls	345.63	169
Controls	322.2	151
Controls	312.29	163
Controls	233.51	136
Controls	243.26	136
Controls	308.36	155
Controls	262.29	148
Controls	234.69	134
Controls	289.33	152
Controls	284.28	163
Controls	329.59	139
Controls	307.92	169
Controls	239.45	138
Controls	175.39	125
Controls	203.91	137
Controls	221.55	133
Controls	262.2	170
Controls	332.41	173
Controls	247.94	132
Controls	274.92	147
Controls	243.4	151
Controls	288.6	150
Controls	211.42	148
Controls	260.59	141
GSMTx-4-stage 14 15 uM	381.22	98
GSMTx-4-stage 14 15 uM	571.88	164
GSMTx-4-stage 14 15 uM	513.2	110
GSMTx-4-stage 14 15 uM	548.65	115
GSMTx-4-stage 14 15 uM	419.98	113
GSMTx-4-stage 14 15 uM	354.92	103
GSMTx-4-stage 14 15 uM	385.26	114
GSMTx-4-stage 14 15 uM	458.66	107
GSMTx-4-stage 14 15 uM	576.67	146
GSMTx-4-stage 14 15 uM	605.6	181
GSMTx-4-stage 14 15 uM	683.78	130
GSMTx-4-stage 14 15 uM	1146.77	98
GSMTx-4-stage 14 15 uM	465.12	96
GSMTx-4-stage 14 15 uM	599.81	93
GSMTx-4-stage 14 15 uM	677.18	120
GSMTx-4-stage 14 15 uM	1000.48	110
GSMTx-4-stage 14 15 uM	521.7	106
GSMTx-4-stage 14 15 uM	1073.57	201
GSMTx-4-stage 14 15 uM	596.55	120
GSMTx-4-stage 14 15 uM	468.61	104
GSMTx-4-stage 14 15 uM	495.99	111
GSMTx-4-stage 14 15 uM	475.37	121
GSMTx-4-stage 14 15 uM	360.14	96
GSMTx-4-stage 14 15 uM	548.21	104
GSMTx-4-stage 14 15 uM	425.72	113
GSMTx-4-stage 14 15 uM	439.16	99
GSMTx-4-stage 14 15 uM	460.34	102
Piezo1 MO	314.37	51
Piezo1 MO	192.46	65
Piezo1 MO	353.57	113
Piezo1 MO	138.82	56
Piezo1 MO	259.98	130
Piezo1 MO	301.51	104
Piezo1 MO	374.02	144
Piezo1 MO	405.96	86
Piezo1 MO	362.97	112
Piezo1 MO	389.76	114
Piezo1 MO	296.44	105
Piezo1 MO	313.93	110
Piezo1 MO	296.89	112
Piezo1 MO	349.86	133
Piezo1 MO	254.15	115
Piezo1 MO	282.15	89
Piezo1 MO	301.39	116
Piezo1 MO	346.72	127
Piezo1 MO	391.2	97
Piezo1 MO	331.45	101
Piezo1 MO	345.99	98
Piezo1 MO	271.73	90
Piezo1 MO	350.93	105
Piezo1 MO	350.05	95
Piezo1 MO	330.23	117
Piezo1 MO	174.16	85
Piezo1 MO	385.93	110
Piezo1 CRISPR	436.42	113
Piezo1 CRISPR	359.86	105
Piezo1 CRISPR	435.05	111
Piezo1 CRISPR	416.3	93
Piezo1 CRISPR	478.59	99
Piezo1 CRISPR	421.83	104
Piezo1 CRISPR	312.023	112
Piezo1 CRISPR	269.91	132
Piezo1 CRISPR	464.36	163
Piezo1 CRISPR	347.06	115
Piezo1 CRISPR	328.37	113
Piezo1 CRISPR	561.56	153
Piezo1 CRISPR	316.88	118
Piezo1 CRISPR	307.42	104
Piezo1 CRISPR	622.57	163
Piezo1 CRISPR	491.92	93
Piezo1 CRISPR	533.83	125
Piezo1 CRISPR	679.43	84
Piezo1 CRISPR	743.05	159
Piezo1 CRISPR	726.18	163
Piezo1 CRISPR	354.8	122
Piezo1 CRISPR	494.89	136
Piezo1 CRISPR	433.17	145
Piezo1 CRISPR	419.73	126
Srambled MO	261.481	126
Srambled MO	222.106	119
Srambled MO	175.506	100
Srambled MO	292.103	131
Srambled MO	284.022	135
Srambled MO	186.714	93
Srambled MO	325.982	148
Srambled MO	311.525	177
Srambled MO	312.444	150
Srambled MO	191.125	127
Srambled MO	164.796	112
Srambled MO	267.388	139
Srambled MO	221.183	134
Srambled MO	258.197	168
Srambled MO	277.517	151
Srambled MO	218.655	142
Srambled MO	191.426	123
Srambled MO	191.962	123
Srambled MO	150.71	102
Srambled MO	293.561	170
Srambled MO	206.188	124
Srambled MO	184.013	106
Srambled MO	206.144	114
Srambled MO	211.829	133
Srambled MO	253.506	150
Srambled MO	278.551	162
Srambled MO	244.563	152
Piezo1 antibody signal intensity
Controls	Piezo1 MO
1	0.377809
0.944081	0.32178
0.831715	0.277133
0.787414	0.466001
0.773021	0.327214
0.750551	0.563578
0.731003	0.456403
0.726303	0.356242
0.719019	0.268446
0.709649	0.518894
0.708621	0.669518
0.697092	0.422353
0.680056	0.369012
0.673733	0.240637
0.671765	0.194067
0.662432	0.2665
0.661918	0.222199
0.650977	0.297716
0.643553	0.192378
0.637406	0.143347
0.635806	0.202497
0.615722	0.148069
0.600654	0.110802
0.590028	0.0884197
0.578536	0.109377
0.572933	0.0775518
0.56418	0.0882876
0.551109	0.133771
0.537304	0.161712
0.52952	0.0775151
0.527684	0.0927229
0.525261	0.207975
0.518865	0.193274
0.516515	0.241416
0.51407	0.200793
0.504553	0.228147
0.503393	0.192818
0.496409	0.126509
0.490234	0.138625
0.484102	0.268835
0.464569	0.232934
0.460009	0.244368
0.44779	0.239404
0.445719	0.254039
0.439161	0.258665
0.424578	0.261896
0.416162	0.355118
0.401461	0.348708
0.385571	0.317403
1	0.318572
0.950712	0.307457
0.870472	0.288851
0.832471	0.289812
0.81941	0.287742
0.794026	0.263468
0.783898	0.269111
0.776283	0.30763
0.736606	0.305436
0.717581	0.302011
0.704495	0.292745
0.652102	0.234413
0.64843	0.240253
0.638129	0.275346
0.625462	0.250776
0.609246	0.254621
0.604687	0.244763
0.581448	0.527749
0.534058	0.543324
	0.524841
	0.471043
	0.501873
	0.695549
	0.614323
	0.686505
	0.701119
	0.501429
	0.476095
	0.402287
	0.49103
	0.495392
	0.488886
