# Supplementary material for: Mechanical stretch scales centriole number to apical area via Piezo1 in multiciliated cells
Source: eLife journal article supplement (doi:10.7554/elife.66076), 2021-06-29
Supplement: supp [file elife-66076-supp-v1.zip › elife_poa_e66076_Figure_6_source_data_6.xlsx]

## Sheet: Source data 6
Animal caps treatments	Apical area	Centriole number
Tethered_control for P1 MO (20ng)	196.766	118
Tethered_control for P1 MO (20ng)	246.074	145
Tethered_control for P1 MO (20ng)	163.935	121
Tethered_control for P1 MO (20ng)	195.371	111
Tethered_control for P1 MO (20ng)	292.895	135
Tethered_control for P1 MO (20ng)	164.213	124
Tethered_control for P1 MO (20ng)	287.922	116
Tethered_control for P1 MO (20ng)	220.662	102
Tethered_control for P1 MO (20ng)	225.939	114
Tethered_control for P1 MO (20ng)	303.731	149
Tethered_control for P1 MO (20ng)	309.999	143
Tethered_control for P1 MO (20ng)	203.741	113
Tethered_control for P1 MO (20ng)	237.037	119
Tethered_control for P1 MO (20ng)	221.087	111
Tethered_control for P1 MO (20ng)	258.548	134
Tethered_P1 MO (20ng)	443.225	120
Tethered_P1 MO (20ng)	333.369	101
Tethered_P1 MO (20ng)	417.465	139
Tethered_P1 MO (20ng)	272.155	103
Tethered_P1 MO (20ng)	342.532	112
Tethered_P1 MO (20ng)	215.014	86
Tethered_P1 MO (20ng)	306.157	114
Tethered_P1 MO (20ng)	162.884	80
Tethered_P1 MO (20ng)	221.37	84
Tethered_P1 MO (20ng)	357.305	118
Tethered_P1 MO (20ng)	397.111	118
Tethered_P1 MO (20ng)	438.231	110
Tethered_P1 MO (20ng)	288.731	115
Tethered_P1 MO (20ng)	256.937	89
TTethered_P1 MO (20ng	392.827	108
Tethered_P1 MO (20ng)	308.664	94
Untethered_control for P1 MO (20ng)	125.362	115
Untethered_control for P1 MO (20ng)	95.361	103
Untethered_control for P1 MO (20ng)	98.191	92
Untethered_control for P1 MO (20ng)	70.737	80
Untethered_control for P1 MO (20ng)	122.026	107
Untethered_control for P1 MO (20ng)	142.182	125
Untethered_control for P1 MO (20ng)	108.683	101
Untethered_control for P1 MO (20ng)	116.629	118
Untethered_control for P1 MO (20ng)	123.522	113
Untethered_control for P1 MO (20ng)	125.362	125
Untethered_control for P1 MO (20ng)	74.113	99
Untethered_control for P1 MO (20ng)	122.552	78
Untethered_control for P1 MO (20ng)	116.952	119
Untethered_control for P1 MO (20ng)	91.398	101
Untethered_control for P1 MO (20ng)	98.191	89
Untethered_control for P1 MO (20ng)	58.648	83
Untethered_control for P1 MO (20ng)	69.059	84
Untethered_control for P1 MO (20ng)	68.534	83
Untethered_control for P1 MO (20ng)	80.83	91
Untethered_P1 MO (20ng)	139.88	111
Untethered_P1 MO (20ng)	130.751	91
Untethered_P1 MO (20ng)	154.112	95
Untethered_P1 MO (20ng)	84.909	63
Untethered_P1 MO (20ng)	100.536	77
Untethered_P1 MO (20ng)	134.621	101
Untethered_P1 MO (20ng)	129.749	122
Untethered_P1 MO (20ng)	75.488	82
Untethered_P1 MO (20ng)	75.751	76
Untethered_P1 MO (20ng)	94.047	98
Untethered_P1 MO (20ng)	98.535	89
Untethered_P1 MO (20ng)	71.344	84
Untethered_P1 MO (20ng)	122.053	79
Untethered_P1 MO (20ng)	139.089	128
Untethered_P1 MO (20ng)	74.325	105
Untethered_P1 MO (20ng)	102.897	101
Untethered_P1 MO (20ng)	65.232	86
Untethered_P1 MO (20ng)	129.709	111
Untethered_P1 MO (20ng)	81.533	95
Untethered_P1 MO (20ng)	88.245	111
Untethered_P1 MO (20ng)	102.72	94
Untethered_P1 MO (20ng)	101.001	93
