# Supplementary figures and images for: Mechanical stretch scales centriole number to apical area via Piezo1 in multiciliated cells
Source: eLife journal article supplement (doi:10.7554/elife.66076), 2021-06-29

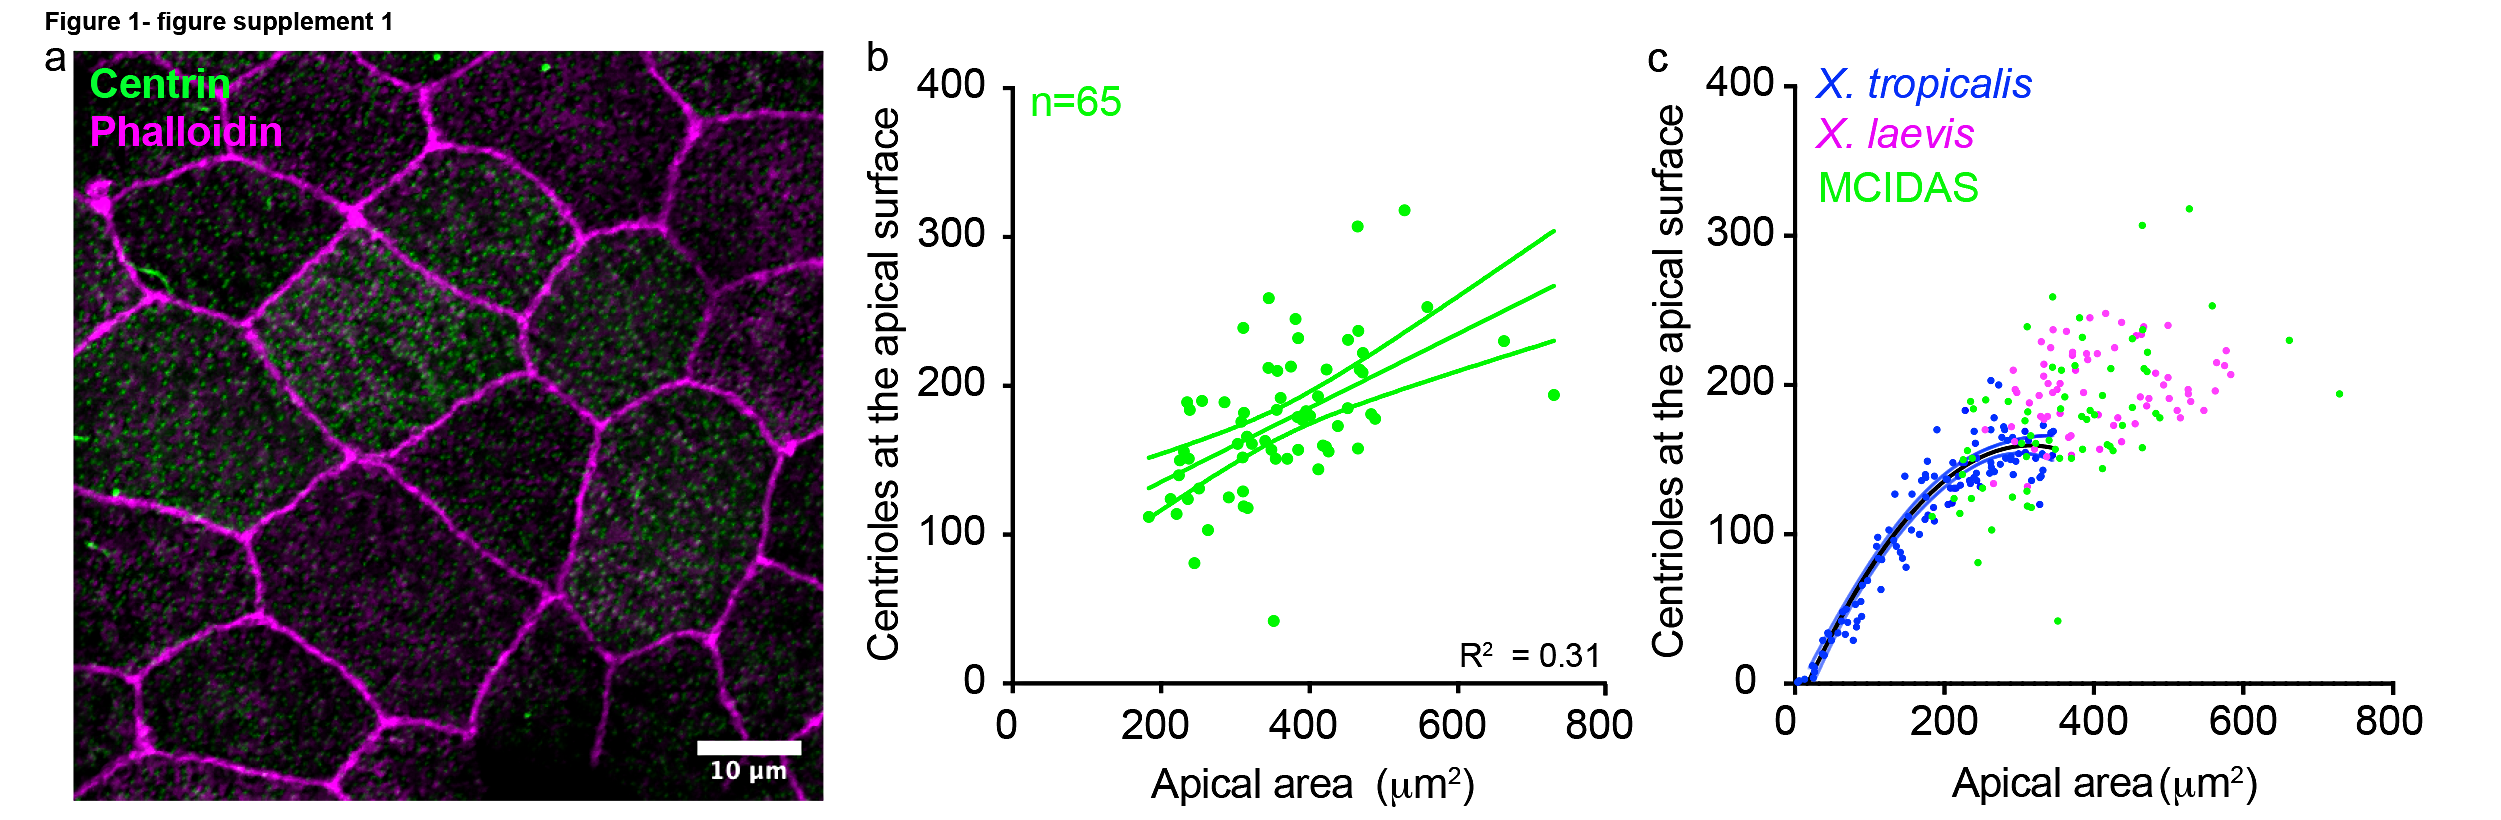

Supplement: supp [file elife-66076-supp-v1.zip › elife_poa_e66076_Figure_1_figure_supplement_1.png]

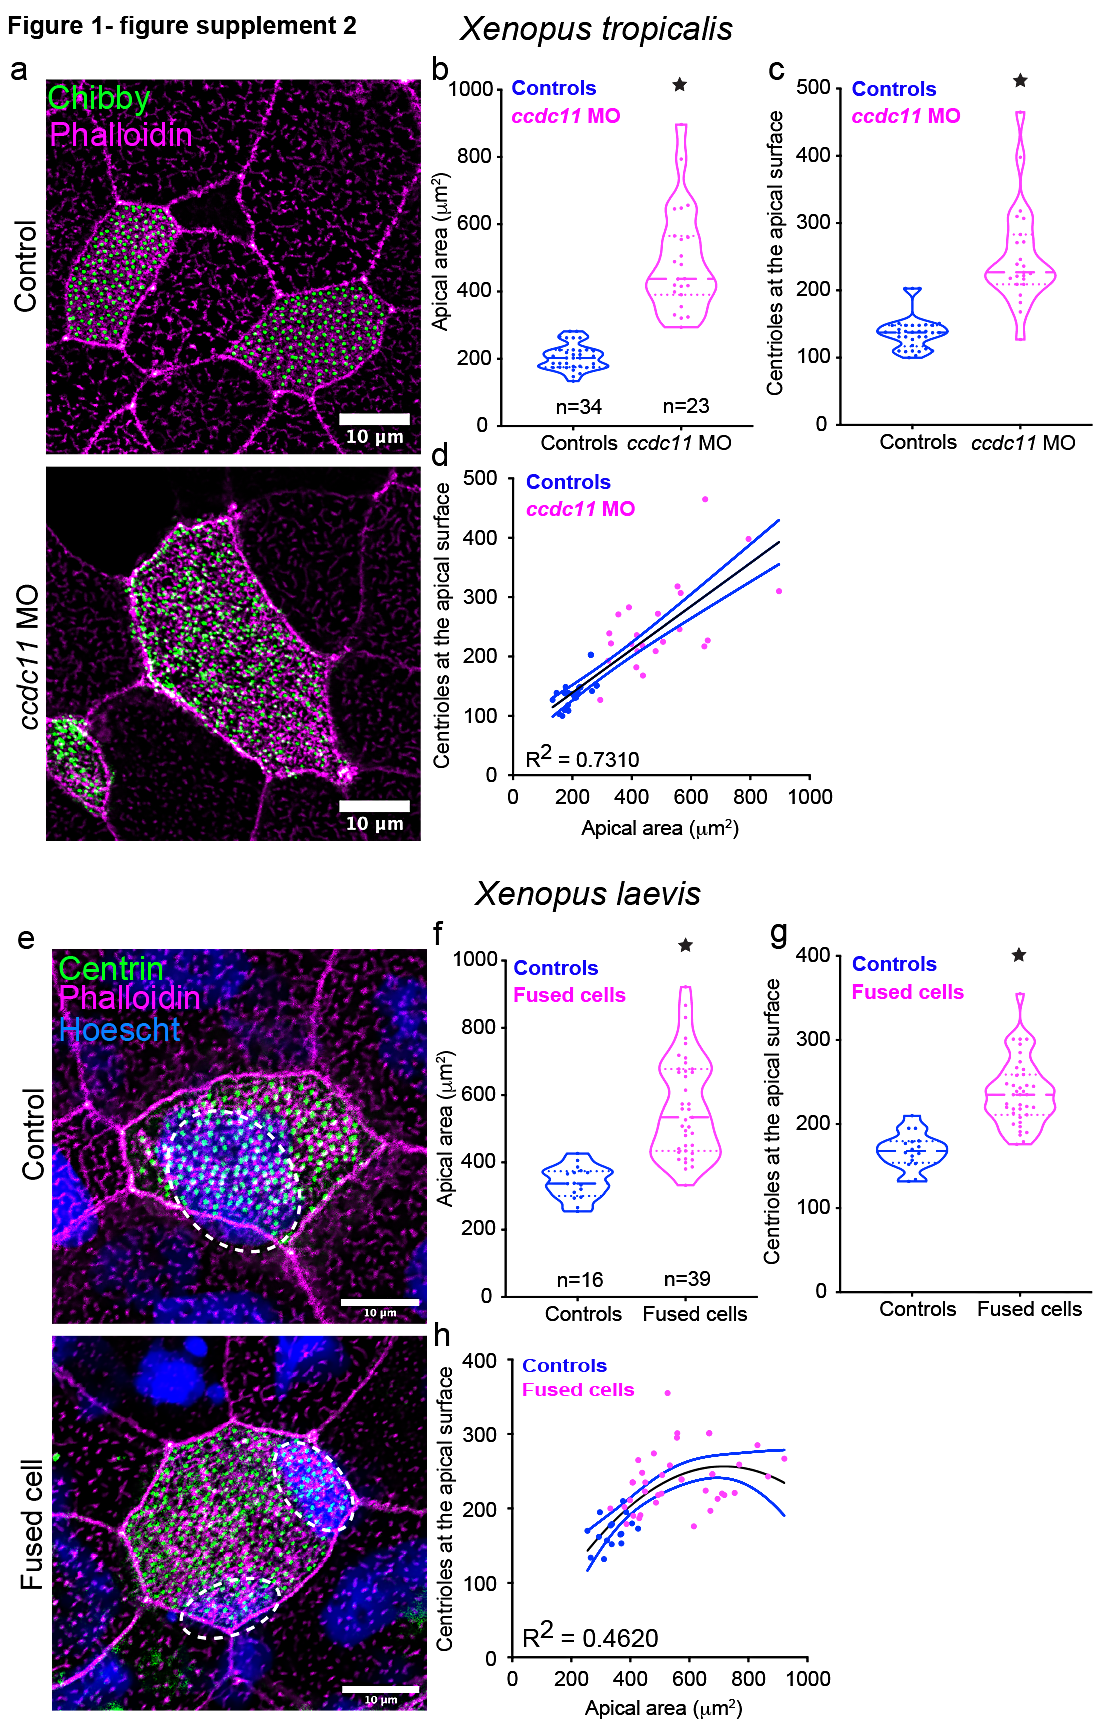

Supplement: supp [file elife-66076-supp-v1.zip › elife_poa_e66076_Figure_1_figure_supplement_2.png]

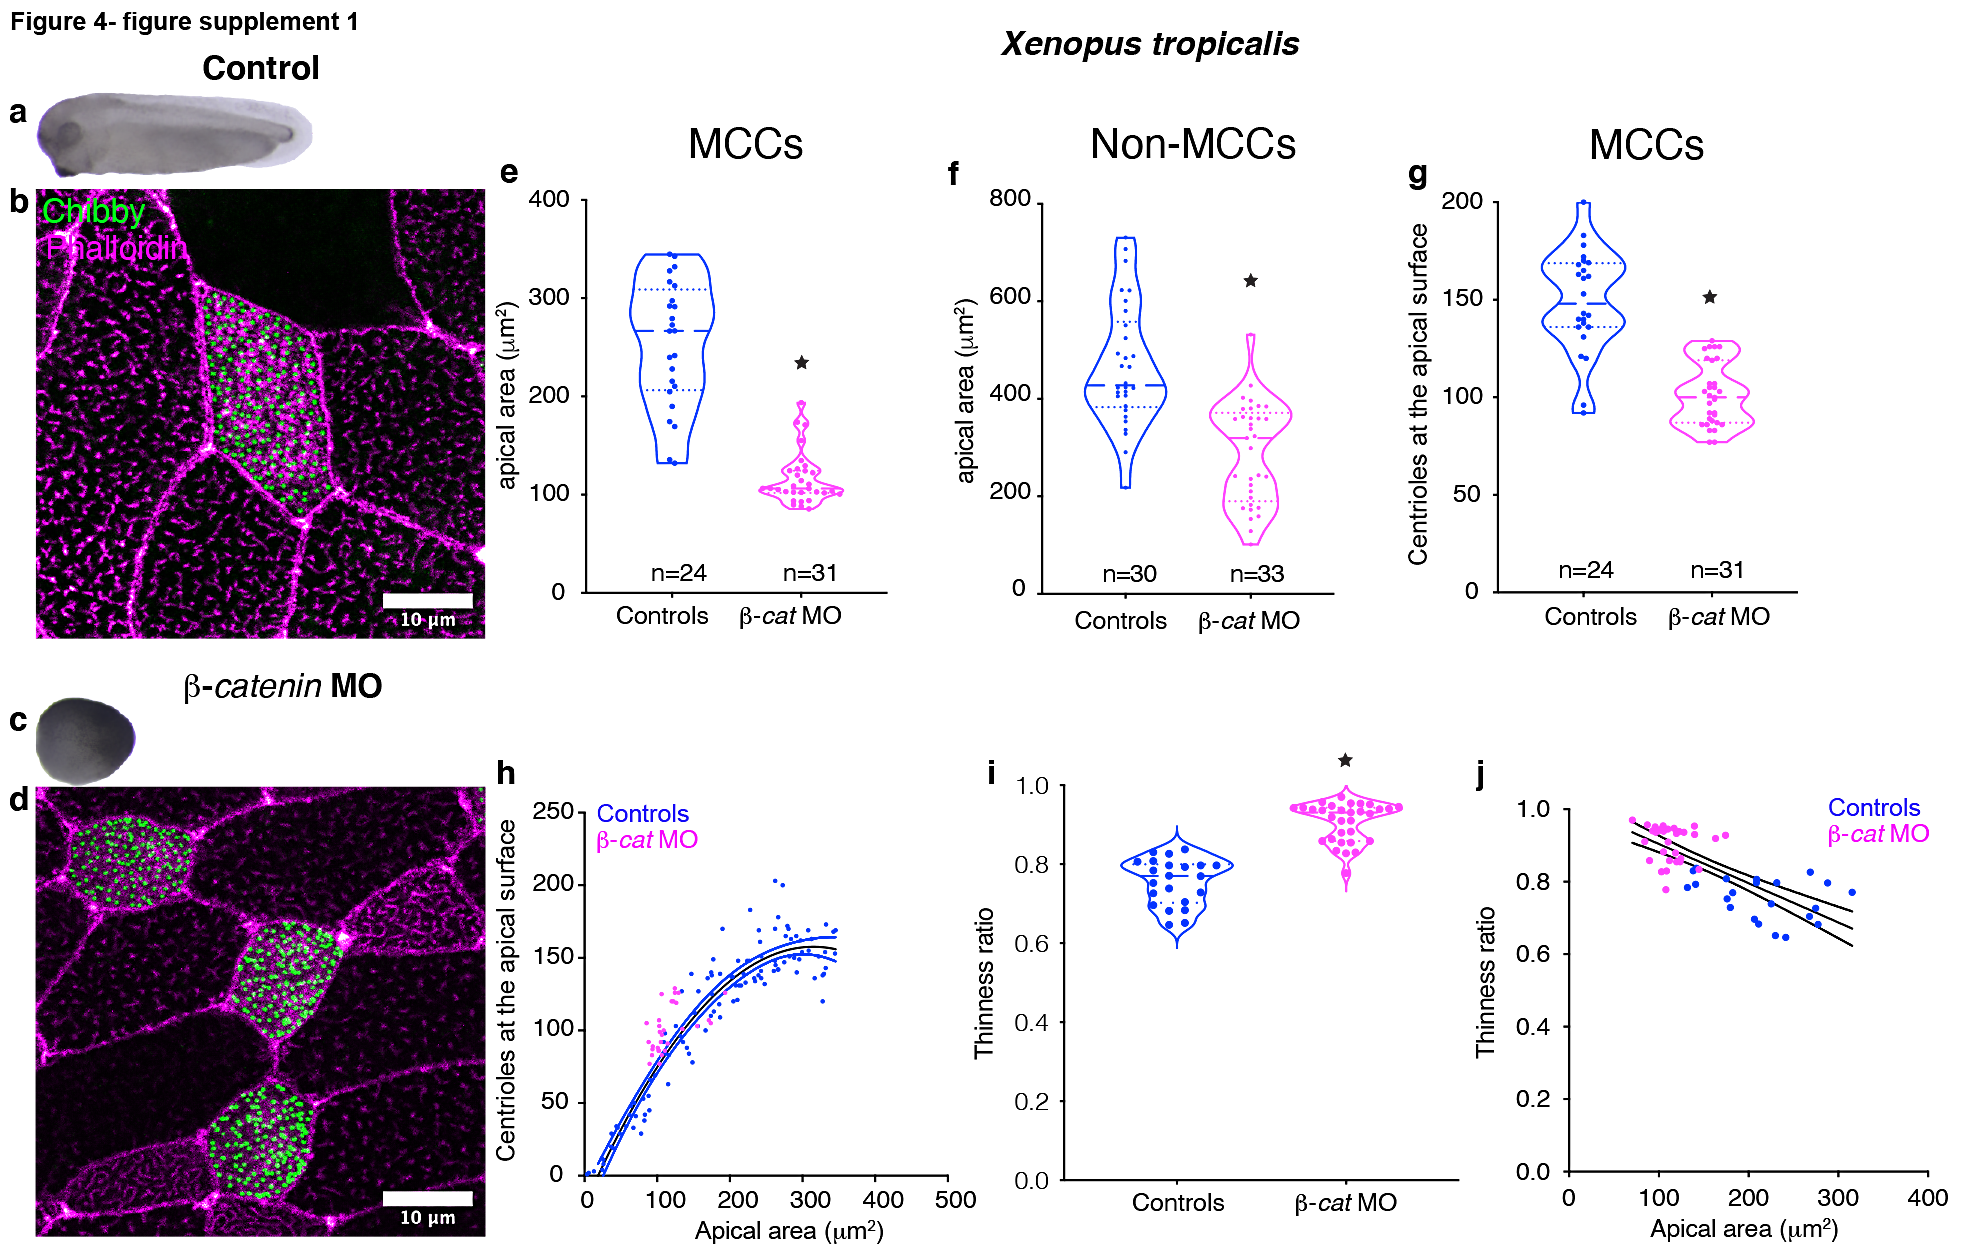

Supplement: supp [file elife-66076-supp-v1.zip › elife_poa_e66076_Figure_4_figure_supplement_1.png]

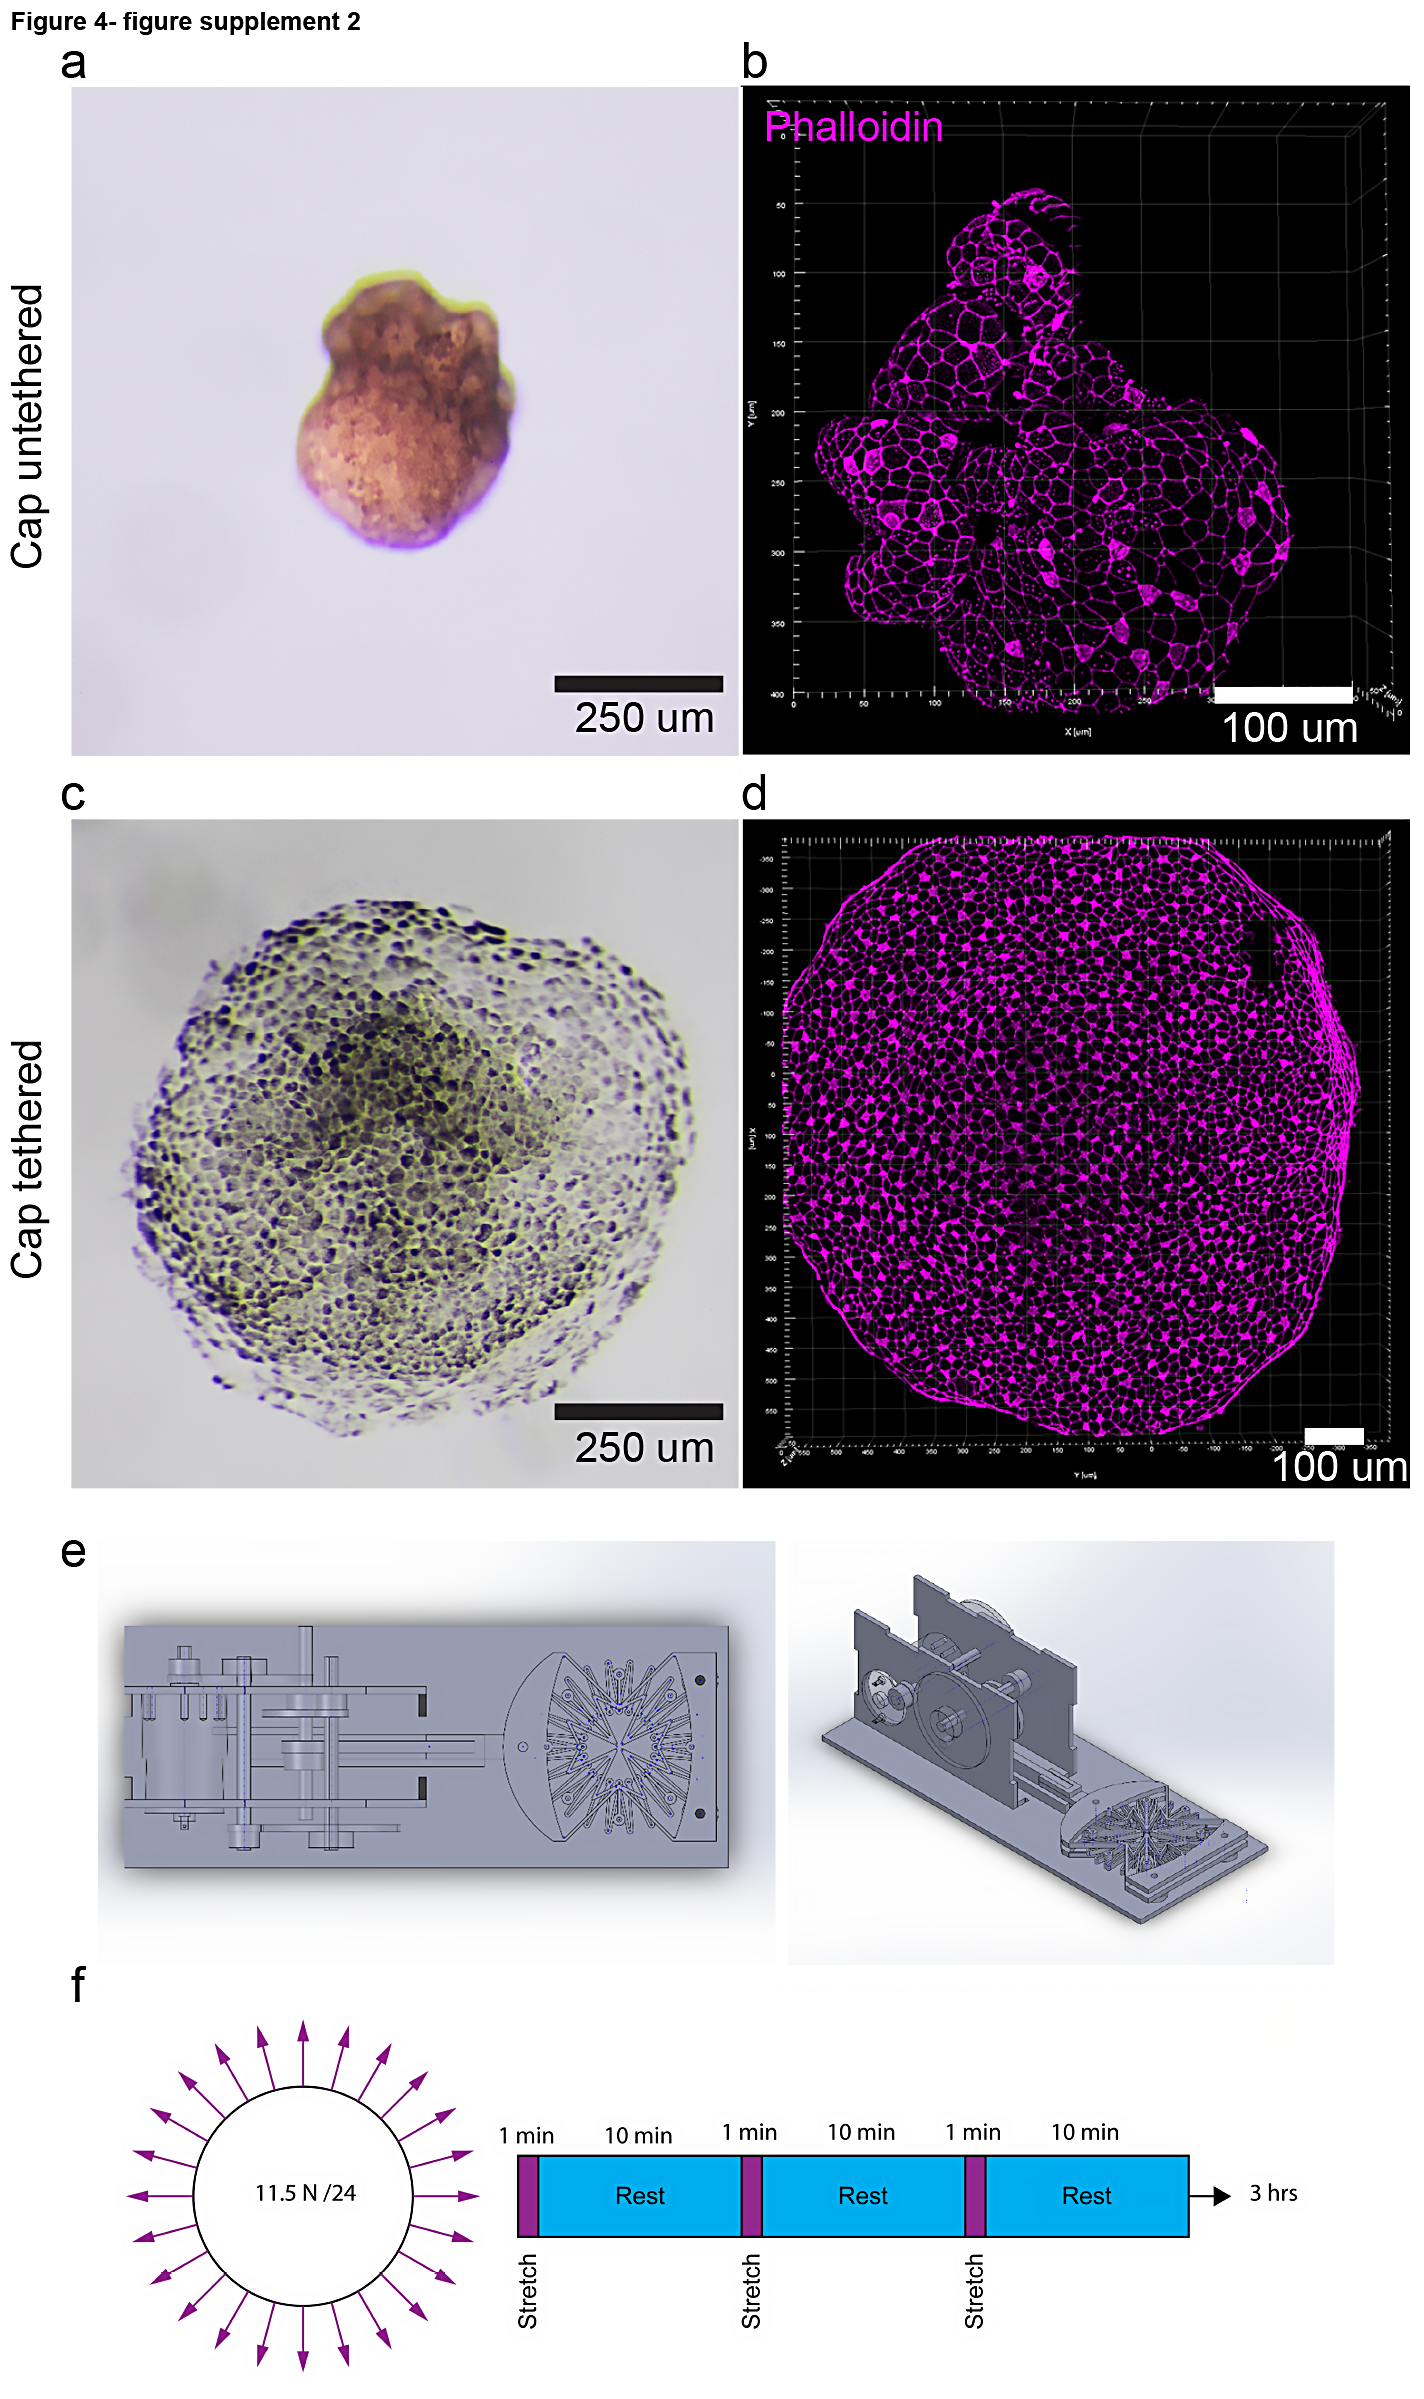

Supplement: supp [file elife-66076-supp-v1.zip › elife_poa_e66076_Figure_4_figure_supplement_2.png]

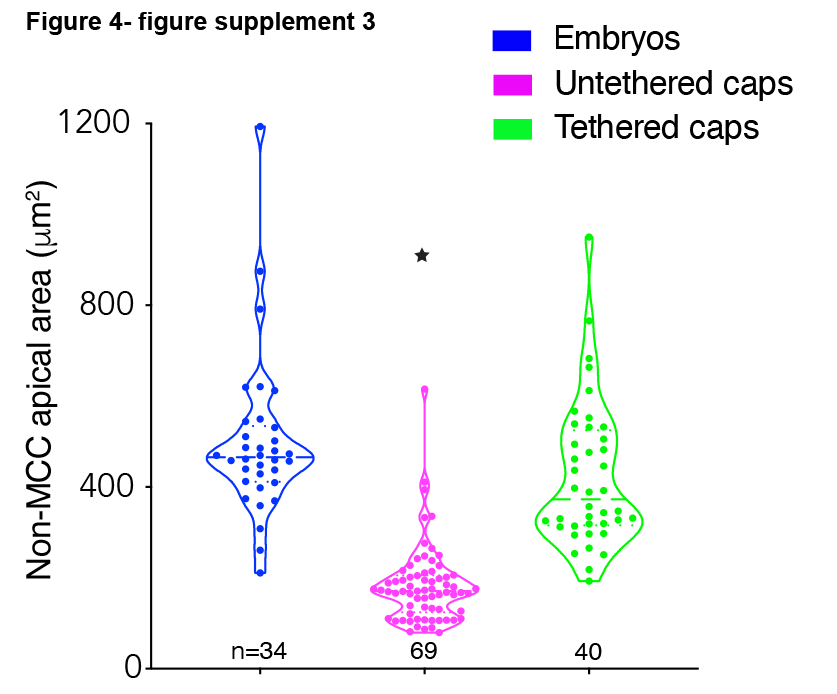

Supplement: supp [file elife-66076-supp-v1.zip › elife_poa_e66076_Figure_4_figure_supplement_3.png]

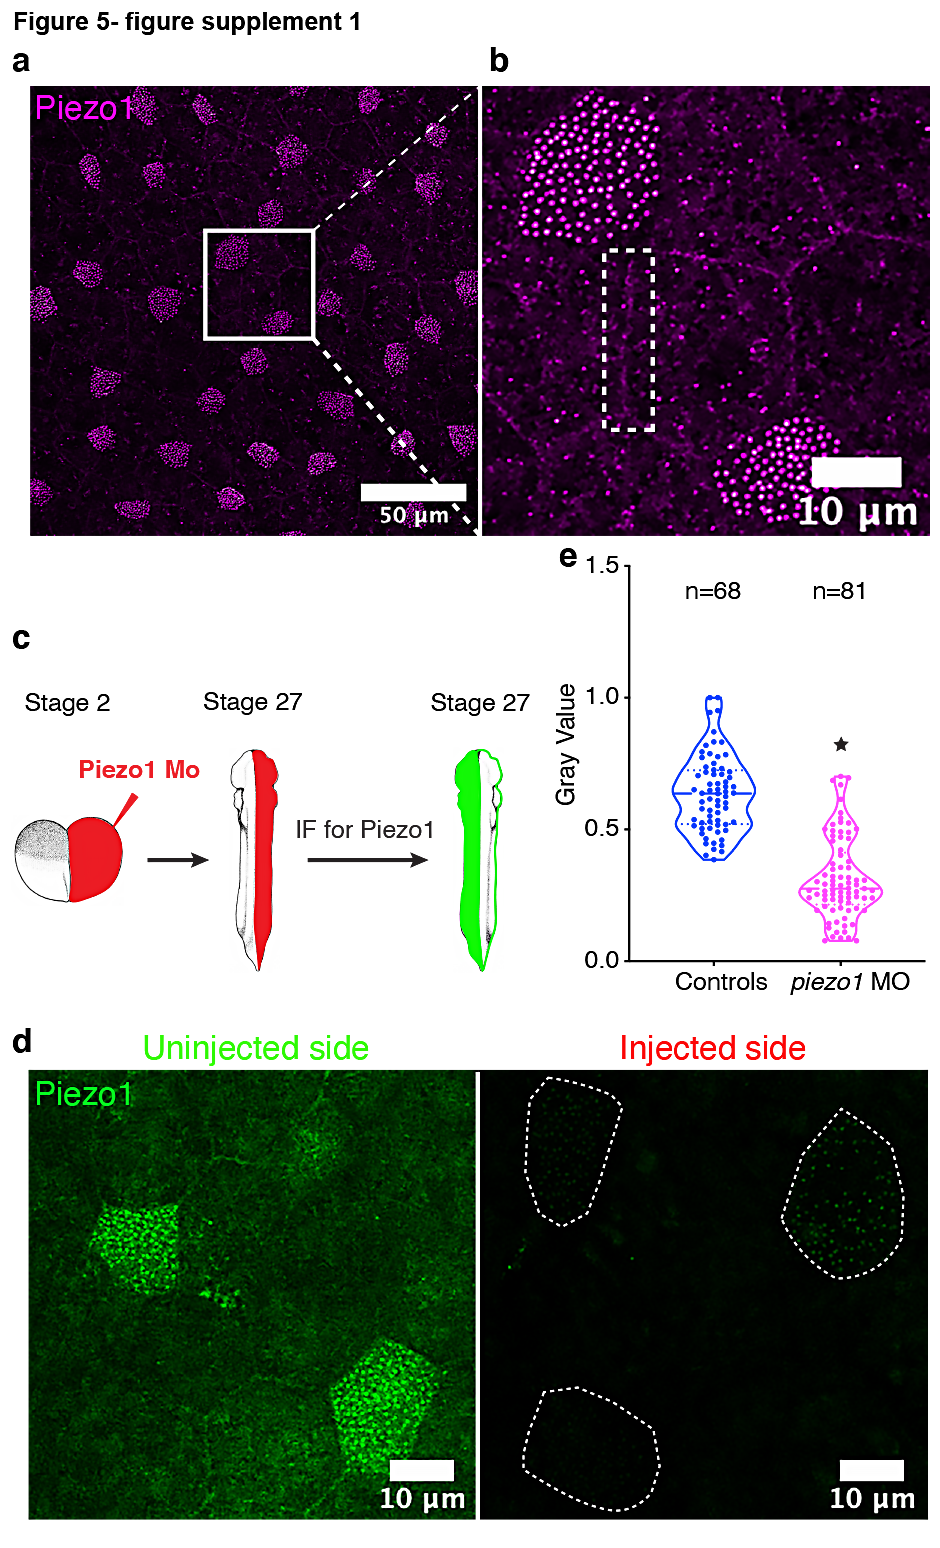

Supplement: supp [file elife-66076-supp-v1.zip › elife_poa_e66076_Figure_5_figure_supplement_1.png]
